# Supplementary material
Source: PubMed Central journal article supplement (PMC5360287)
Supplement: DC160953SupplementaryData.pdf [file DC160953SupplementaryData.pdf]

SUPPLEMENTARY DATA

**Supplementary Table S1.** Characteristics of the Older Adults with Diabetes\*

| Characteristic                               | Overall*                            | 65-75 years old                     | >75 years old                       |
|----------------------------------------------|-------------------------------------|-------------------------------------|-------------------------------------|
|                                              | Number (%)                          | Number (%)                          | Number (%)                          |
| <b>Total</b>                                 | 303,097 (100 )                      | 176,805 (58.3)                      | 126,292 (41.7)                      |
| <b>Sex</b>                                   |                                     |                                     |                                     |
| Male                                         | 299,249 (98.7)                      | 174,342 (98.6)                      | 124,907 (98.9)                      |
| Female                                       | 3,848 (1.3)                         | 2,463 (1.4)                         | 1,385 (1.1)                         |
| <b>Anti-glycemic agents</b>                  |                                     |                                     |                                     |
| Other than Insulin or Sulfonylureas          | 5,506 (1.8)                         | 2,812 (1.6)                         | 2,694 (2.1)                         |
| Sulfonylureas only                           | 53,092 (17.5)                       | 22,167 (12.5)                       | 30,925 (24.5)                       |
| Sulfonylureas and Metformin only             | 55,999 (18.5)                       | 36,191 (20.5)                       | 19,808 (15.7)                       |
| Sulfonylureas and other (not Insulin)        | 12,619 (4.2)                        | 7,577 (4.3)                         | 5,042 (4.0)                         |
| Insulin only                                 | 91,319 (30.1)                       | 50,029 (28.3)                       | 41,290 (32.7)                       |
| Insulin and Metformin only                   | 36,878 (12.2)                       | 27,695 (15.7)                       | 9,183 (7.3)                         |
| Insulin and Sulfonylureas only               | 21,013 (7.0)                        | 10,797 (6.1)                        | 10,216 (8.1)                        |
| Insulin and Sulfonylureas and Metformin only | 19,294 (6.4)                        | 14,562 (8.2)                        | 4,732 (3.8)                         |
| Insulin and other                            | 7,377(2.4)                          | 4,975 (2.8)                         | 2,402 (1.9)                         |
| <b>Serum creatinine (mg/dl)</b>              |                                     |                                     |                                     |
| not available                                | 39,405 (13.0)                       | 21,508 (12.2)                       | 17,897 (14.2)                       |
| <1.7                                         | 228,467 (75.4)                      | 138,902 (78.6)                      | 89,565 (70.9)                       |
| 1.7-<2.0                                     | 17,114 (5.6)                        | 7,490 (4.2)                         | 9,624 (7.6)                         |
| 2.0-<2.5                                     | 9,574 (3.2)                         | 4,156 (2.4)                         | 5,418 (4.3)                         |
| 2.5-<3.0                                     | 3,209 (1.1)                         | 1,499 (0.8)                         | 1,710 (1.4)                         |
| >=3.0                                        | 5,328 (1.8)                         | 3,250 (1.8)                         | 2,078 (1.6)                         |
| <b>Coexisting co-morbid conditions</b>       |                                     |                                     |                                     |
| Presence of >=1 co-morbid condition          | 193,689 (63.9)                      | 106,866(60.4)                       | 86,823 (68.7)                       |
| Serum creatnine >=1.7 mg/dl                  | 35,225 (11.6)                       | 16,395 (9.3)                        | 18,830 (14.9)                       |
| Diminished Life Expectancy <sup>†</sup>      | 39,282 (13.0)                       | 20,410 (11.5)                       | 18,872 (15.0)                       |
| Cancer                                       | 38,520 (12.7)                       | 19,772 (11.2)                       | 18,748 (14.9)                       |
| Advanced Diabetic Complications <sup>‡</sup> | 29,896 (9.9)                        | 16,063 (9.1)                        | 13,833 (11.0)                       |
| Advanced retinopathy                         | 29,177 (9.7)                        | 15,548 (8.9)                        | 13,629 (10.8)                       |
| Cognitive impairment or Dementia             | 23,981 (7.9)                        | 9,451 (5.4)                         | 14,530 (11.5)                       |
| Other Neurological Conditions <sup>§</sup>   | 12,459 (4.1)                        | 6,727 (3.8)                         | 5,732 (4.6)                         |
| Cardio-vascular diseases <sup>  </sup>       | 127,565 (42.1)                      | 68,777 (39.0)                       | 58,788 (46.6)                       |
| Myocardial infarction                        | 7,763 (2.6)                         | 4,540 (2.6)                         | 3,223 (2.6)                         |
| Chronic heart failure                        | 30,967 (10.2)                       | 16,034 (9.1)                        | 14,933 (11.7)                       |
| Ischemic vascular disease                    | 116,721 (38.6)                      | 63,176 (35.8)                       | 53,545 (42.5)                       |
| Major depression                             | 14,317 (4.7)                        | 11,659 (6.6)                        | 2,658 (2.1)                         |
| Alcohol/substance abuse                      | 9,497 (3.2)                         | 8,278 (4.7)                         | 1,219 (1.0)                         |
| <b>Glycemic control</b>                      |                                     |                                     |                                     |
| HbA1c, mean±SD, %                            | 7.6±1.4                             | 7.7±1.4                             | 7.4±1.2                             |
| <6.5                                         | (60 ±15.3mmol/mol)<br>55,705 (18.4) | (61 ±15.3mmol/mol)<br>29,668 (16.8) | (57 ±13.1mmol/mol)<br>26,037 (20.6) |

## SUPPLEMENTARY DATA

|            |                |                |                |
|------------|----------------|----------------|----------------|
| 6.5 - <7.0 | 53,248 (17.3)  | 28,773 (16.3)  | 23,575 (18.7)  |
| 7.0 - 7.4  | 55,587 (18.2)  | 31,401 (17.7)  | 24,186 (19.1)  |
| 7.5 - 8.5  | 84,398 (27.8)  | 50,185 (28.4)  | 34,213 (27.1)  |
| 8.6 - 9.0  | 19,782 (6.5)   | 12,531 (7.1)   | 7,251 (5.8)    |
| >9         | 35,277 (11.7)  | 24,247 (13.8)  | 11,030 (8.7)   |
| [<7        | 108,053 (35.7) | 58,441 (33.1)  | 49,612 (39.3)  |
| <8         | 209,896 (69.3) | 116,917 (66.1) | 92,979 (73.6)] |

Abbreviation: HbA1c, hemoglobin A1c.

SI conversion factors: To convert serum creatinine to micromoles per liter multiply by 88.4;

\* includes patients, aged 65+, with HbA1c value available in fiscal year (FY) 2013, who were receiving any anti-glycemic medications, except Metformin-only prior last HbA1c in FY 2013.

<sup>†</sup> Diminished Life Expectancy includes end-stage hepatic disease and cancer (excluding basal and squamous skin cancers).

<sup>‡</sup> Advanced Diabetic Complications includes end-stage renal disease, amputation, and advanced retinopathy.

<sup>§</sup> Other Neurological Conditions includes gastroparesis, Parkinson disease, aphasia, dysphasia, hemiplegia, apraxia, epilepsy, transient ischemic attack.

<sup>||</sup> Patient may have more than one cardio-vascular condition. Subcategories are not mutually exclusive.
